# Supplementary material for: Protracted brain development in a rodent model of extreme longevity
Source: PubMed Central journal article supplement (PMC4484490; doi:10.1038/srep11592), 2015-06-29

# Protracted brain development in a rodent model of extreme longevity

*Running title:* Delayed brain development of the naked mole rat

Orsolya K. Penz<sup>1,\*</sup>, Janos Fuzik<sup>1,2,\*</sup>, Aleksandra B. Kurek<sup>2</sup>, Roman Romanov<sup>1</sup>, John Larson<sup>3,4,5</sup>, Thomas J. Park<sup>3,4</sup>, Tibor Harkany<sup>1,2,&,#</sup> & Erik Keimpema<sup>1,2,&,#</sup>

<sup>1</sup>*Division of Molecular Neurobiology, Department of Medical Biochemistry & Biophysics, Scheeles väg 1:A1, Karolinska Institutet, SE-17177 Stockholm, Sweden;* <sup>2</sup>*Department of Molecular Neurosciences, Center for Brain Research, Medical University of Vienna, Spitalgasse 4, A-1090 Vienna, Austria;* <sup>3</sup>*Department of Biological Sciences,* <sup>4</sup>*Laboratory for Integrative Neuroscience, University of Illinois, 840 West Taylor Street, Chicago, IL 60607, USA, and* <sup>5</sup>*Department of Psychiatry, University of Illinois College of Medicine, 1601 West Taylor Street, Chicago, IL 60612.*

\*O.K.P. and J.F. contributed equally to this study.

&E.K. and T.H. share senior authorship

#*Address correspondence to:* Tibor Harkany (at the Karolinska Institutet); *e-mail:* [Tibor.Harkany@ki.se](mailto:Tibor.Harkany@ki.se) or Erik Keimpema (at the Medical University of Vienna); *e-mail:* [Erik.Keimpema@meduniwien.ac.at](mailto:Erik.Keimpema@meduniwien.ac.at)

## This file contains:

- *Supplementary Figures 1 - 5*
- *Legends to Supplementary Figures*
- *Supplementary References*

## Legends to Supplementary Figures

**Figure S1 Brain morphology and antigen confirmation in naked mole rats. (a)** Brain morphology and size of neonatal and adult C57Bl6/N mice. **(a<sub>1</sub>)** Protracted brain growth in naked mole rats aged from 4 days to 21 years. All brains were scaled to those in (a), and photographed on a millimeter-scaled background. Note that postnatal brain development continues to at least 1 year of age in naked mole rats. **(b)** List of markers used for immunofluorescence labeling and Western blotting. Antibodies used in this study to investigate the localization and identity of neuronal and glial populations in the brains of mice and naked mole rats were listed, including working dilutions and suppliers. Anti-VGLUT1 antibody from guinea-pig hosts was made available by H. Hioki and T. Kaneko. The specificity of these antibodies were previously extensively characterized, including the use of knock-out mice and pre-adsorption with respective immunizing antigen<sup>1</sup>. **(c)** Representative Western blots showing equivalent molecular weights of target proteins from mouse and naked mole rats probed with antibodies listed in (b).  $\beta$ -actin was used to probe for equivalent protein loading in the various samples used for Western blotting. *Abbreviations:* cr, cerebellum; ctx, cerebral cortex; forebr., forebrain; NMR, naked mole rat; ob, olfactory bulb.

**Figure S2 Cell proliferation in the naked mole rat. (a)** EdU<sup>+</sup> cells labeled in the E18.5 mouse embryonic hippocampus, pulsed with a single EdU injection at E14.5. **(b)** Auto-fluorescent eliminator (A.F. eliminator) quenched auto-fluorescence (*open arrowheads*) found in unlabeled tissues but did not affect fluorescence after Click-iT labeling (*closed arrowheads*). Note that auto-fluorescent cells bleed through in both channels. **(c)** Ki67<sup>+</sup> cells were found in naked mole rat progenitor proliferation areas, including the svz-rms-ob axis. **(d,e)** Complete z-stacks spanning the entire depth of the tissues of GFAP immunofluorescence in the fimbria hippocampi of 5 months old (glass mounted, 14  $\mu$ m; d) and 21 year old (free-floating, 50  $\mu$ m; e) naked mole rat sections show similar antibody penetration regardless of tissue processing and thickness. Note that auto-fluorescence quenching shrinks tissue thickness due to dehydration. *Abbreviations:* CA1, cornu ammonis 1; CPu, caudate putamen; ctx, cortex; h, hilus; lv, lateral ventricle; ob, olfactory bulb; rms, rostral migratory stream; sgz, subgranular zone; svz, subventricular zone. *Scale bars* = 50  $\mu$ m (a,b,c), 10  $\mu$ m (d), 5  $\mu$ m (e,f).

**Figure S3** Comparative topological mapping of DCX<sup>+</sup> cells and processes immunoreactive for PSA-NCAM in juvenile and adult mice and naked mole rats. **(a-b<sub>1</sub>)** Serial sections from both species were processed simultaneously. The nomenclature introduced by Paxinos *et al.* for mice<sup>2</sup> and by Xiao *et al.* for naked mole rats<sup>3</sup> was used. Coordinates indicate distances from bregma. Green ovals and processes denote the localization of somata and leading/trailing processes of doublecortin (DCX)-positive cells, respectively. PSA-NCAM immunoreactivity was scaled from deep orange (high expression) to white (negative) by an examiner blinded to the age of the particular animals. Labeling patterns in mice at both ages correspond to data published<sup>4</sup>. *Abbreviations:* 3v, third ventricle; ac, anterior commissure; AO, anterior olfactory nucleus; AOD, anterior olfactory nucleus, dorsal; AOV, anterior olfactory bulb, ventral; APT, anterior pretecal nucleus; aq, aqueduct; arc, arcuate nucleus; av, anteroventral thalamic nucleus; bla, basolateral amygdaloid nucleus, anterior; bhp, basolateral amygdaloid nucleus posterior; CA1-3, Cornu Ammonis subfields 1-3; cc, corpus callosum; CG, cingulum; cing, cingulate cortex; cp, cerebral peduncle; CPu, caudate putamen; Ctx, cortex; DG, dentate gyrus; EPL, external plexiform layer; GL, glomerular layer; gp, globus pallidus; GRL, granular layer; hc, hippocampus; HDB, horizontal diagonal band of Broca; ic, internal capsule; itr, internal thalamic radiation; LEnt, lateral entorhinal cortex; LO, lateral orbital cortex; LGC, lateral geniculate complex; lv, lateral ventricle; MG, medial geniculate nucleus; MM, medial mammillary nucleus; MS, medial septum; ov, olfactory ventricle; PG, periaqueductal grey; pir, piriform cortex; PLCo, posterolateral cortical amygdaloid nucleus; PM, premammillary nucleus; PV, paraventricular thalamic nucleus; rms, rostral migratory stream; RN, red nucleus; s, subiculum; sctx, somatosensory cortex; SN(r), substantia nigra (pars reticulata); SuM, Supramammillary nucleus; VGC, ventral geniculate complex; vmh, ventromedial hypothalamus; VO, ventral orbital cortex.

**Figure S4** Structural plasticity in the rostral migratory stream of naked mole rats. **(a-c)** DCX<sup>+</sup>/PSA-NCAM<sup>+</sup> migrating neurons (*arrows*) populate the rostral migratory stream in the neonatal and adult mouse brain. Note that DCX<sup>+</sup> fibers radiate past secretagogin<sup>+</sup> neurons<sup>5,6</sup>, into the granule layer towards the glomeruli (c, inset 1). **(d)** Similar, neonates and 5-month-old naked mole rats showed DCX<sup>+</sup>/PSA-NCAM<sup>+</sup> migrating neurons (*arrows*) in the rostral migratory stream towards the olfactory bulb. **(e,f)** In contrast to mice (b,c), DCX was highly expressed in the olfactory bulb of the 1 year old naked mole rat. Note the reduced amount of secretagogin<sup>+</sup> cells in the granule layer of naked mole rats (f). **(g,h)** In aged naked mole rats, neurogenesis was reduced with sporadic

DCX<sup>+</sup> neurons present in the 21-year-old olfactory bulb. Comparable to the hippocampus, PSA-NCAM immunoreactivity remained in the adult olfactory bulb (inset 5). Numbered boxes denote insets. *Scale bars* = 100  $\mu\text{m}$  (f,g), 40  $\mu\text{m}$  (a,b,c,d,e,h), 10  $\mu\text{m}$  (1,2,3,4,5).

**Figure S5** **Biophysical properties and dendrite morphology of a dentate granule cell in the 4-month-old naked mole rat.** (a) Representative current-clamp recording of a CA1 pyramidal cell in the mouse hippocampus. Note that the peak AP current corresponds to the calculated Na<sup>+</sup> reversal potential. (b,b<sub>1</sub>) Current clamp recordings of a reconstructed granule cell (b<sub>1</sub>) with the most hyperpolarizing and depolarizing current steps depicted in black. Membrane potential traces shown in red were evoked by a depolarizing current step at 2x threshold of the cells (in red). (b<sub>2</sub>) Phase diagram of 2x action potential threshold stimulus. The first action potential phase diagram was colored red with subsequent traces progressively shaded from warm to cool colors, ending in blue.

## References

1. Kaneko, T., Fujiyama, F., & Hioki, H. Immunohistochemical localization of candidates for vesicular glutamate transporters in the rat brain. *J Comp Neurol* **444**, 39-62 (2002).
2. Paxinos, G. & Franklin, K.B.J in *The Mouse Brain in Stereotactic Coordinates* (Gulf Professional Publishing, 2004).
3. Xiao, J., Levitt, J.B., & Buffenstein, R. A stereotaxic atlas of the brain of the naked mole-rat (*Heterocephalus glaber*). *Neuroscience* **141**, 1415-1435 (2006).
4. Nacher, J., Crespo, C., & McEwen, B.S. Doublecortin expression in the adult rat telencephalon. *Eur. J Neurosci.* **14**, 629-644 (2001).
5. Mulder, J. *et al.* Secretagogin is a Ca<sup>2+</sup>-binding protein specifying subpopulations of telencephalic neurons. *Proc. Natl. Acad. Sci. U. S. A* **106**, 22492-22497 (2009).
6. Attems, J. *et al.* Clusters of secretagogin-expressing neurons in the aged human olfactory tract lack terminal differentiation. *Proc. Natl. Acad. Sci. U. S. A* **109**, 6259-6264 (2012).

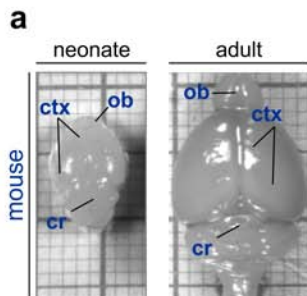

**b**

| antibody                 | host       | histochemistry | WB      | catalogue # | supplier                  |
|--------------------------|------------|----------------|---------|-------------|---------------------------|
| Cleaved caspase-3        | rabbit     | 1:500          |         | 9664        | Cell Signaling Technology |
| Doublecortin             | goat       | 1:200          | 1:500   | SC-8066     | Santa Cruz Biotechnology  |
| GFAP                     | mouse      | 1:2,000        | 1:1,000 | MAB3402     | Millipore                 |
| Ki67                     | rabbit     | 1:500          |         | AB9260      | Millipore                 |
| L1-NCAM                  | rat        | 1:2,000        |         | MAB5272     | Millipore                 |
| <i>Solanum t. lectin</i> |            | 1:100          |         | B-1165      | Vector                    |
| Nestin                   | mouse      | 1:500          |         | MAB353      | Millipore                 |
| PSA-NCAM                 | mouse      | 1:400          |         | MAB5324     | Millipore                 |
| Secretagogin             | rabbit     | 1:200          | 1:500   |             | Dr. L. Wagner             |
| VGAT                     | rabbit     | 1:500          | 1:1,000 | 131003      | Synaptic Systems          |
| VGLUT1                   | guinea pig | 1:500          | 1:1,000 |             | Dr. T. Kaneko             |

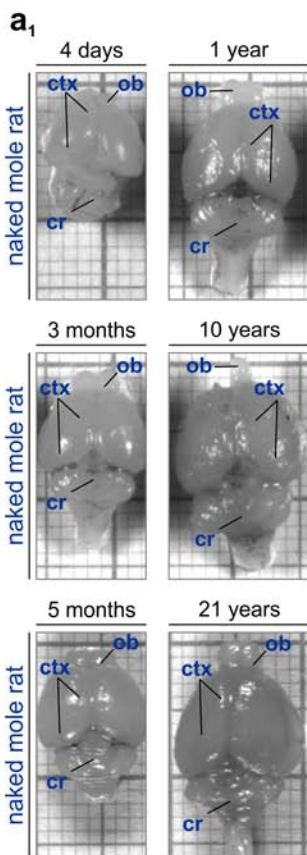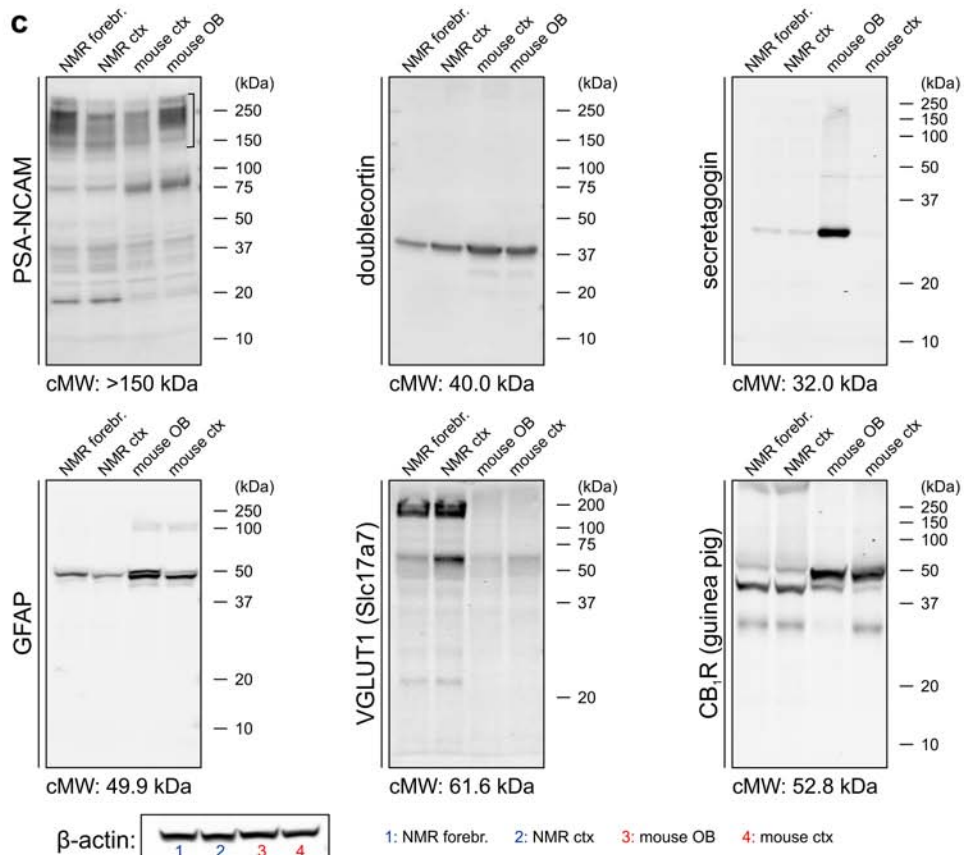

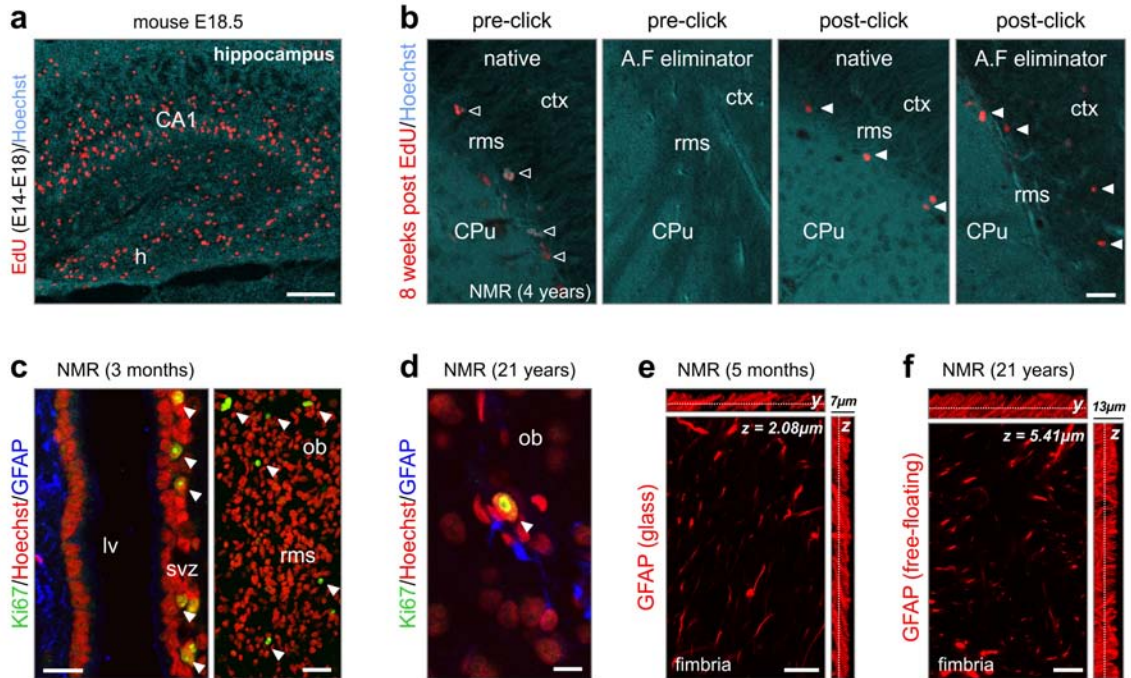







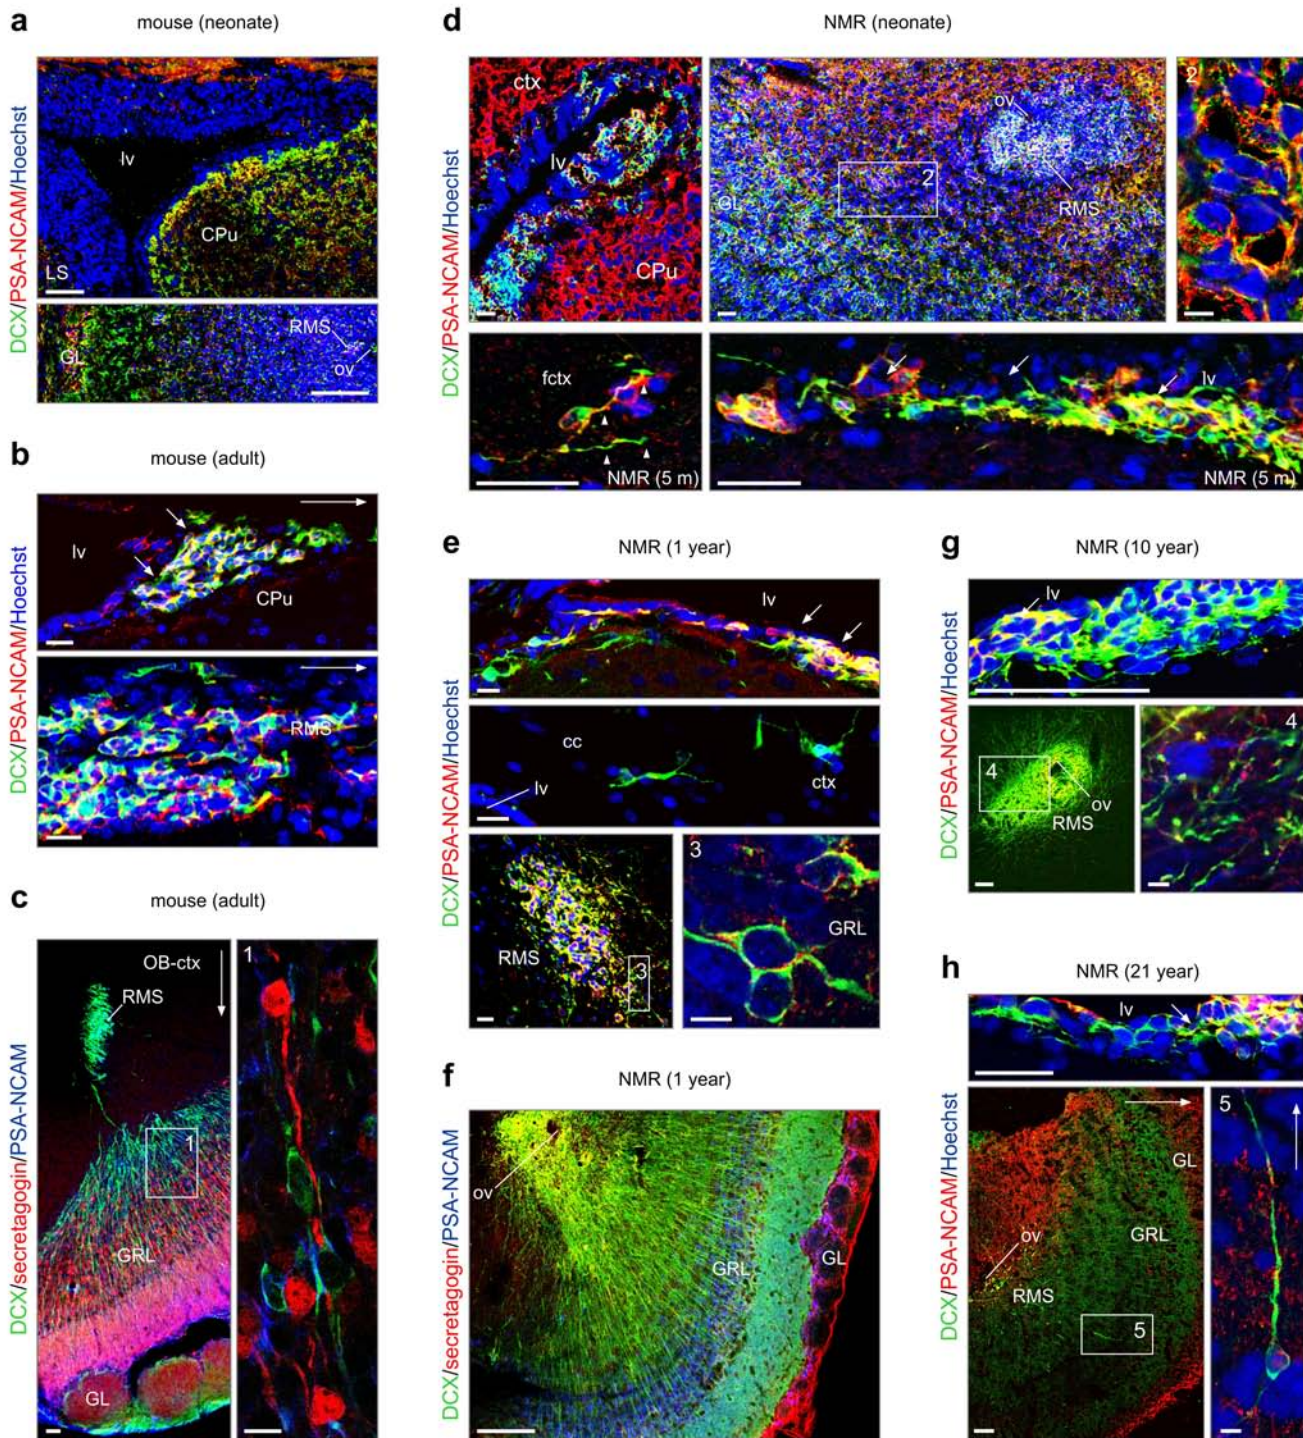



Penz, Fuzik *et al.* - Supplementary Figure 5

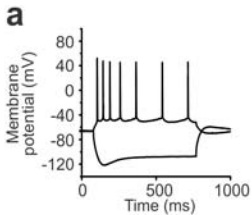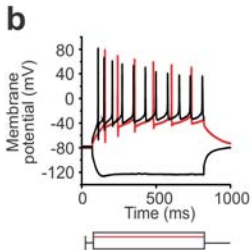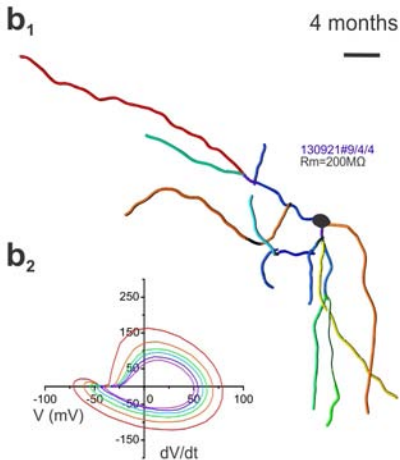

Supplement: srep11592-s1.pdf [file srep11592-s1.pdf]
